# Supplementary material
Source: publisher figshare collection journal article supplement (https://sage.figshare.com/ndownloader/files/17763374)
Supplement: Supplementary file 1 [file 17763374]

## APPENDIX A

Complete search strategy for Scopus

```
( TITLE-ABS-KEY ( "Collaborative mapping" OR "Community mapping" OR "Docent  
method" OR "Photo elicitation" OR "Photo novella" OR photonovella OR "Photo voice"  
OR photovoice OR sensecam OR "Video diaries" OR "Video diary" OR "Video elicitation"  
OR "Video intervention" OR videovoice OR "Visual voices" ) ) OR ( ( TITLE-ABS-KEY (   
"applied visual anthropology" OR "auto photographic" OR autovideography OR "Body  
mapping" OR "collaborative video" OR "disposable cameras" OR "ethnographic  
photography" OR "free drawing" OR "free drawings" OR "image based research" OR  
mapmaking OR "photo interviewing" OR "video making" OR "videographic study" OR  
"visual anthropology" OR "visual epidemiology" OR "visual ethnography" OR "visual illness  
narratives" OR "visual methodologies" OR "visual methodology" OR "visual methods" OR  
"visual narrative" OR "visual narratives" OR "visual sociology" OR "visual storytelling" ) )  
AND ( TITLE-ABS-KEY ( cbpr OR collaboration* OR collaborative OR community OR  
informant* OR participant* OR participatory ) ) )
```
